# Supplementary material for: Efficacy of an Optimised Bacteriophage Cocktail to Clear Clostridium difficile in a Batch Fermentation Model
Source: PubMed Central journal article supplement (PMC5872124; doi:10.3390/antibiotics7010013), 2018-02-13
Supplement: antibiotics-07-00013-s001.pdf [file antibiotics-07-00013-s001.pdf]

| name                        | taxID | Max.1   | %V1.cladeReads.. | %V2.cladeReads.. | %V3.cladeReads.. | %V4.cladeRea | %V5.cladeReads.. | lineage                                                                         |
|-----------------------------|-------|---------|------------------|------------------|------------------|--------------|------------------|---------------------------------------------------------------------------------|
| Firmicutes                  | P     | 1239    | 47.81            | 41.62            | 37.57            | 25.84        | 47.81            | 45.75 cellular&nbsp;organisms>Bacteria                                          |
| Bacteroidetes               | P     | 976     | 31.41            | 30.32            | 31.41            | 23.31        | 24.91            | 26.21 cellular&nbsp;organisms>Bacteria>Bacteroidetes/Chlorobi&nbsp;group        |
| Proteobacteria              | P     | 1224    | 29.86            | 10.42            | 14.64            | 29.86        | 12.33            | 12.49 cellular&nbsp;organisms>Bacteria                                          |
| Actinobacteria              | P     | 201174  | 13.56            | 13.21            | 13.56            | 11.38        | 12.04            | 12.76 cellular&nbsp;organisms>Bacteria                                          |
| Cyanobacteria               | P     | 1117    | 8.761            | 0.1308           | 0.1063           | 8.761        | 0.1319           | 0.1711 cellular&nbsp;organisms>Bacteria                                         |
| Euryarchaeota               | P     | 28890   | 2.223            | 2.223            | 0.8629           | 0.0785       | 0.9436           | 0.7242 cellular&nbsp;organisms>Archaea                                          |
| Verrucomicrobia             | P     | 74201   | 1.36             | 1.36             | 1.152            | 0.1308       | 1.029            | 1.143 cellular&nbsp;organisms>Bacteria>Chlamydiae/Verrucomicrobia&nbsp;group    |
| Deinococcus-Thermus         | P     | 1297    | 0.1968           | 0.1352           | 0.144            | 0.1744       | 0.1968           | 0.1711 cellular&nbsp;organisms>Bacteria                                         |
| Spirochaetes                | P     | 203691  | 0.1669           | 0.1494           | 0.1319           | 0.1396       | 0.1669           | 0.1605 cellular&nbsp;organisms>Bacteria                                         |
| Synergistetes               | P     | 508458  | 0.09374          | 0.07253          | 0.07942          | 0.07414      | 0.09374          | 0.07445 cellular&nbsp;organisms>Bacteria                                        |
| Chlorobi                    | P     | 1090    | 0.06864          | 0.06044          | 0.05654          | 0.03925      | 0.05254          | 0.06864 cellular&nbsp;organisms>Bacteria>Bacteroidetes/Chlorobi&nbsp;group      |
| Acidobacteria               | P     | 57723   | 0.06381          | 0.04286          | 0.03635          | 0.05669      | 0.05872          | 0.06381 cellular&nbsp;organisms>Bacteria>Fibrobacteres/Acidobacteria&nbsp;group |
| Chloroflexi                 | P     | 200795  | 0.06327          | 0.04176          | 0.06327          | 0.05233      | 0.05666          | 0.05414 cellular&nbsp;organisms>Bacteria                                        |
| Fusobacteria                | P     | 32066   | 0.04286          | 0.04286          | 0.02692          | 0.01308      | 0.02781          | 0.02127 cellular&nbsp;organisms>Bacteria                                        |
| Planctomycetes              | P     | 203682  | 0.04018          | 0.02857          | 0.02423          | 0.03053      | 0.04018          | 0.02707 cellular&nbsp;organisms>Bacteria                                        |
| Tenericutes                 | P     | 544448  | 0.03769          | 0.03516          | 0.03769          | 0.008722     | 0.02575          | 0.02224 cellular&nbsp;organisms>Bacteria                                        |
| Thermotogae                 | P     | 200918  | 0.02019          | 0.01099          | 0.02019          | 0.004361     | 0.01545          | 0.01064 cellular&nbsp;organisms>Bacteria                                        |
| Chrysiogenetes              | P     | 200938  | 0.01545          | 0.01538          | 0.008077         | NA           | 0.01545          | 0.008701 cellular&nbsp;organisms>Bacteria                                       |
| Fibrobacteres               | P     | 65842   | 0.01308          | 0.008791         | 0.009423         | 0.01308      | 0.01236          | 0.01064 cellular&nbsp;organisms>Bacteria>Fibrobacteres/Acidobacteria&nbsp;group |
| Gemmatimonadetes            | P     | 142182  | 0.01212          | 0.00989          | 0.01212          | 0.008722     | 0.008241         | 0.009668 cellular&nbsp;organisms>Bacteria                                       |
| Chlamydiae                  | P     | 204428  | 0.01209          | 0.01209          | 0.006731         | NA           | 0.007211         | 0.005801 cellular&nbsp;organisms>Bacteria>Chlamydiae/Verrucomicrobia&nbsp;group |
| Crenarchaeota               | P     | 28889   | 0.0116           | 0.006593         | 0.006731         | 0.004361     | 0.008241         | 0.0116 cellular&nbsp;organisms>Archaea                                          |
| Nitrospirae                 | P     | 40117   | 0.01064          | 0.00989          | 0.006731         | NA           | 0.007211         | 0.01064 cellular&nbsp;organisms>Bacteria                                        |
| Elusimicrobia               | P     | 74152   | 0.009271         | 0.005494         | 0.004039         | 0.004361     | 0.009271         | 0.003867 cellular&nbsp;organisms>Bacteria                                       |
| Deferribacteres             | P     | 200930  | 0.006593         | 0.006593         | 0.005385         | NA           | 0.00206          | 0.005801 cellular&nbsp;organisms>Bacteria                                       |
| Aquificae                   | P     | 200783  | 0.005801         | 0.004395         | 0.004039         | 0.004361     | 0.005151         | 0.005801 cellular&nbsp;organisms>Bacteria                                       |
| Ignavibacteriae             | P     | 1134404 | 0.004395         | 0.004395         | NA               | NA           | 0.00206          | 0.003867 cellular&nbsp;organisms>Bacteria>Bacteroidetes/Chlorobi&nbsp;group     |
| Armatimonadetes             | P     | 67819   | 0.004361         | 0.002198         | 0.004039         | 0.004361     | 0.00103          | 0.0009668 cellular&nbsp;organisms>Bacteria                                      |
| Thermodesulfobacteria       | P     | 200940  | 0.003297         | 0.003297         | NA               | NA           | 0.00103          | NA cellular&nbsp;organisms>Bacteria                                             |
| Cloacimonetes               | P     | 456828  | 0.002692         | 0.002198         | 0.002692         | NA           | NA               | 0.001934 cellular&nbsp;organisms>Bacteria>unclassified&nbsp;Bacteria            |
| Caldiserica                 | P     | 67814   | 0.002692         | 0.001099         | 0.002692         | NA           | 0.00206          | 0.0009668 cellular&nbsp;organisms>Bacteria                                      |
| Dictyoglomi                 | P     | 68297   | 0.00206          | 0.001099         | 0.001346         | NA           | 0.00206          | 0.0009668 cellular&nbsp;organisms>Bacteria                                      |
| Candidatus Saccharibacteria | P     | 95818   | 0.001346         | 0.001099         | 0.001346         | NA           | NA               | NA cellular&nbsp;organisms>Bacteria>unclassified&nbsp;Bacteria                  |
| Thaumarchaeota              | P     | 651137  | 0.001099         | 0.001099         | NA               | NA           | NA               | 0.0009668 cellular&nbsp;organisms>Archaea                                       |
